# Supplementary material for: Advancements in extracellular vesicles biomanufacturing: a comprehensive overview of large-scale production and clinical research
Source: Front Bioeng Biotechnol. 2025 Feb 19;13:1487627. doi: 10.3389/fbioe.2025.1487627 (PMC11879961; doi:10.3389/fbioe.2025.1487627)
Supplement: Supplementary file 1 [file Table2.xlsx]

## Sheet: Sheet1
Table S2. Mesenchymal stem cell (MSC)-derived extracellular vesicles
Rank	Title	Status	Study Results	Conditions	Interventions	Locations	URL
1	Safety and Efficacy of Pluripotent Stem Cell-derived Mesenchymal Stem Cell Exosome (PSC-MSC-Exo) Eye Drops Treatment for Dry Eye Diseases Post Refractive Surgery and Associated With Blepharospasm	Not yet recruiting	No Results Available	Dry Eye Disease	Drug: Pluripotent Stem Cell-derived Mesenchymal Stem Cell Exosome (PSC-MSC-Exo) Eye Drops	2nd Affiliated Hospital, School of Medicine, Zhejiang University, Hanzhou, Zhejiang, China	https://ClinicalTrials.gov/show/NCT05738629
2	A Clinical Study of Mesenchymal Stem Cell Exosomes Nebulizer for the Treatment of ARDS	Unknown status	No Results Available	Acute Respiratory Distress Syndrome	Biological: low dose hMSC-Exos|Biological: medium dose hMSC-Exos|Biological: high dose hMSC-Exos|Biological: Dosage 1of hMSC-Exos|Biological: Dosage 2 of hMSC-Exos|Biological: No hMSC-derived exosomes	Ruijin Hospital, Medical School of Shanghai Jiaotong University, Shanghai, Shanghai, China	https://ClinicalTrials.gov/show/NCT04602104
3	A Clinical Study on Safety and Effectiveness of Mesenchymal Stem Cell Exosomes for the Treatment of COVID-19.	Recruiting	No Results Available	COVID-19 Pneumonia	Biological: Extracellular Vesicles from Mesenchymal Stem Cells	The First Affiliated Hospital of Wenzhou Medical University, Wenzhou, Zhejiang, China	https://ClinicalTrials.gov/show/NCT05787288
4	Safety and Efficacy of Umbilical Cord Mesenchymal Stem Cell Exosomes in Treating Chronic Cough After COVID-19	Recruiting	No Results Available	Long COVID-19 Syndrome	Biological: MSC-derived exosomes	Huazhong University of Science and Technology Union Shenzhen Hospital, Shenzhen, Guangdong, China	https://ClinicalTrials.gov/show/NCT05808400
5	A Tolerance Clinical Study on Aerosol Inhalation of Mesenchymal Stem Cells Exosomes In Healthy Volunteers	Completed	Has Results	Healthy	Biological: 1X level of MSCs-Exo|Biological: 2X level of MSCs-Exo|Biological: 4X level of MSCs-Exo|Biological: 6X level of MSCs-Exo|Biological: 8X level of MSCs-Exo	Ruijin Hospital Shanghai Jiao Tong University School of Medicine, Shanghai, Shanghai, China	https://ClinicalTrials.gov/show/NCT04313647
6	The Effect of Stem Cells and Stem Cell Exosomes on Visual Functions in Patients With Retinitis Pigmentosa	Recruiting	No Results Available	Retinitis Pigmentosa	Biological: Subtenon injection of Wharton jelly derived mesenchymal stem cells|Biological: Subtenon injection of Wharton jelly derived mesenchymal stem cell exosomes|Other: Placebo	Erciyes University, Faculty of Medicine, Kayseri, Turkey	https://ClinicalTrials.gov/show/NCT05413148
7	A Pilot Clinical Study on Inhalation of Mesenchymal Stem Cells Exosomes Treating Severe Novel Coronavirus Pneumonia	Completed	No Results Available	Coronavirus	Biological: MSCs-derived exosomes	Ruijin Hospital Shanghai Jiao Tong University School of Medicine, Shanghai, Shanghai, China	https://ClinicalTrials.gov/show/NCT04276987
8	microRNAs Role in Pre-eclampsia Diagnosis	Completed	No Results Available	Preeclampsia			https://ClinicalTrials.gov/show/NCT03562715
9	The Use of Exosomes for the Treatment of Acute Respiratory Distress Syndrome or Novel Coronavirus Pneumonia Caused by COVID-19	Not yet recruiting	No Results Available	Covid19|Novel Coronavirus Pneumonia|Acute Respiratory Distress Syndrome	Drug: MSC-exosomes delivered intravenously every other day on an escalating dose: (2:4:8)|Drug: MSC-exosomes delivered intravenously every other day on an escalating dose (8:4:8)|Drug: MSC-exosomes delivered intravenously every other day (8:8:8)	Mission Community Hospital, Panorama City, California, United States	https://ClinicalTrials.gov/show/NCT04798716
10	UCMSC-Exo for Chemotherapy-induced Myelosuppression in Acute Myeloid Leukemia	Not yet recruiting	No Results Available	Acute Myeloid Leukemia|Neutropenia|Anemia|Thrombocytopenia|Infections|Bleeding	Biological: umbilical cord derived mesenchymal stem cells exosomes (UCMSC-Exo)		https://ClinicalTrials.gov/show/NCT06245746
11	Effect of Mesenchymal Stem Cells-derived Exosomes in Decompensated Liver Cirrhosis	Recruiting	No Results Available	Decompensated Liver Cirrhosis	Biological: MSC-derived exosomes	Research Institute of Gastroenterology & Liver Diseases, Tehran, Iran, Islamic Republic of	https://ClinicalTrials.gov/show/NCT05871463
12	Safety of Injection of Placental Mesenchymal Stem Cell Derived Exosomes for Treatment of Resistant Perianal Fistula in Crohn's Patients	Unknown status	No Results Available	Perianal Fistula in Patients With Crohn's Disease	Other: placenal MSC derived exosomes	Division of Colorectal Surgery, Department of Surgery, Tehran University of Medical Sciences, Tehran, Iran, Tehran, Iran, Islamic Republic of	https://ClinicalTrials.gov/show/NCT05499156
13	Safety and Efficiency of Method of Exosome Inhalation in COVID-19 Associated Pneumonia	Unknown status	No Results Available	Covid19|SARS-CoV-2 PNEUMONIA|COVID-19	Drug: EXO 1 inhalation|Drug: EXO 2 inhalation|Drug: Placebo inhalation	Medical Centre Dinasty, Samara, Russian Federation	https://ClinicalTrials.gov/show/NCT04602442
14	Evaluation of Safety and Efficiency of Method of Exosome Inhalation in SARS-CoV-2 Associated Pneumonia.	Completed	Has Results	Covid19|SARS-CoV-2 PNEUMONIA|COVID-19	Drug: EXO 1 inhalation|Drug: EXO 2 inhalation|Drug: Placebo inhalation	Medical Centre Dinasty, Samara, Russian Federation	https://ClinicalTrials.gov/show/NCT04491240
15	Allogenic Mesenchymal Stem Cell Derived Exosome in Patients With Acute Ischemic Stroke	Unknown status	No Results Available	Cerebrovascular Disorders	Biological: exosome	Shahid Beheshti University of Medical Sciences, Tehran, Iran, Islamic Republic of	https://ClinicalTrials.gov/show/NCT03384433
16	Safety and Efficacy of Injection of Human Placenta Mesenchymal Stem Cells Derived Exosomes for Treatment of Complex Anal Fistula	Recruiting	No Results Available	Fistula Perianal	Other: placenta-MSCs derived exosomes	Division of Colorectal Surgery, Department of Surgery, Tehran University of Medical Sciences, Tehran, Iran, Tehran, Iran, Islamic Republic of	https://ClinicalTrials.gov/show/NCT05402748
17	The Role of Mesenchymal Stem Cell and Exosome in Treating Pilonidal Sinus Disease in Children	Recruiting	No Results Available	Pilonidal Sinus|Pilonidal Disease	Other: Crystallized phenol|Biological: Crystallized phenol + Exosome|Biological: Crystallized phenol + Stem Cell|Biological: Crystallized phenol + Exosome + Stem Cell	Mustafa Azizo臒lu, Istanbul, Turkey	https://ClinicalTrials.gov/show/NCT06391307
18	Clinical Efficacy of Exosome in Degenerative Meniscal Injury	Recruiting	No Results Available	Knee; Injury, Meniscus (Lateral) (Medial)|Meniscus Tear|Meniscus Lesion|Meniscus; Degeneration|Meniscus; Laceration|Meniscus Injury, Tibial|Knee Injuries|Knee Pain Swelling|Arthralgia	Drug: SF-MSC-EX|Drug: SF-MSC	Eskisehir Osmangazi University, Eskisehir, Turkey	https://ClinicalTrials.gov/show/NCT05261360
19	MSC-Exos Promote Healing of MHs	Unknown status	No Results Available	Macular Holes	Biological: exosomes derived from mesenchymal stem cells (MSC-Exo)	Tianjin Medical University Hospital, Tianjin, China	https://ClinicalTrials.gov/show/NCT03437759
20	Exosome of Mesenchymal Stem Cells for Multiple Organ Dysfuntion Syndrome After Surgical Repaire of Acute Type A Aortic Dissection	Not yet recruiting	No Results Available	Multiple Organ Failure	Biological: Exosome of MSC		https://ClinicalTrials.gov/show/NCT04356300
21	Effect of UMSCs Derived Exosomes on Dry Eye in Patients With cGVHD	Unknown status	No Results Available	Dry Eye	Drug: Umbilical Mesenchymal Stem Cells derived Exosomes	Zhongshan Ophthalmic Center, Guangzhou, Guangdong, China	https://ClinicalTrials.gov/show/NCT04213248
22	A Proof of Concept Study to Evaluate Exosomes From Human Mesenchymal Stem Cells in Women With Premature Ovarian Insufficiency (POI)	Recruiting	No Results Available	Premature Ovarian Insufficiency|Diminished Ovarian Reserve	Drug: VL-PX10	Optimal Health Associates, Oklahoma City, Oklahoma, United States	https://ClinicalTrials.gov/show/NCT06072794
23	Mesenchymal Stem Cells Derived Exosomes in Skin Rejuvenation	Recruiting	No Results Available	Anti Aging	Combination Product: exosime injection	Isfahan University of Medical Sciences, Isfahan, Iran, Islamic Republic of	https://ClinicalTrials.gov/show/NCT05813379
24	Co-transplantation of Mesenchymal Stem Cell Derived Exosomes and Autologous Mitochondria for Patients Candidate for CABG Surgery	Recruiting	No Results Available	Myocardial Infarction|Myocardial Ischemia|Myocardial Stunning	Biological: mitochondria and MSC-derived exosomes	Tehran University of Medical Sciences, Tehran, Iran, Islamic Republic of	https://ClinicalTrials.gov/show/NCT05669144
25	A Clinical Study of Mesenchymal Progenitor Cell Exosomes Nebulizer for the Treatment of Pulmonary Infection	Unknown status	No Results Available	Drug-resistant	Biological: Dosage 1 of MPCs-derived exosomes|Biological: Dosage 2 of MPCs-derived exosomes|Biological: No MPCs-derived exosomes	Ruijin Hospital Shanghai Jiao Tong University School of Medicine, Shanghai, Shanghai, China	https://ClinicalTrials.gov/show/NCT04544215
26	Efficacy and Safety of EXOSOME-MSC Therapy to Reduce Hyper-inflammation In Moderate COVID-19 Patients	Unknown status	No Results Available	SARS-CoV2 Infection	Drug: Exosome-MSC Intravenous injection|Drug: Placebo Intravenous Injection|Drug: COVID-19 Standard Treatment	RSPAD Gatot Soebroto, Jakarta, DKI Jakarta, Indonesia|RSUP Dr. M. Jamil, Padang, West Sumatra, Indonesia|RSUP Dr. Sardjito, Yogyakarta, Indonesia	https://ClinicalTrials.gov/show/NCT05216562
27	Exosome Effect on Prevention of Hairloss	Recruiting	No Results Available	Hair Loss|Alopecia	Device: Exosome	Leila Dehghani, Isfahan, Iran, Islamic Republic of	https://ClinicalTrials.gov/show/NCT05658094
28	Safety and Effectiveness of Placental Derived Exosomes and Umbilical Cord Mesenchymal Stem Cells in Moderate to Severe Acute Respiratory Distress Syndrome (ARDS) Associated With the Novel Corona Virus Infection (COVID-19)	Recruiting	No Results Available	COVID-19 Acute Respiratory Distress Syndrome|Respiratory Distress Syndrome	Drug: EV-Pure鈩?and WJ-Pure鈩Drug: Placebo	Kit Bartalos, Liberty, Missouri, United States	https://ClinicalTrials.gov/show/NCT05387278
29	Immune Modulation by Exosomes in COVID-19	Recruiting	No Results Available	COVID-19|Critical Illness|Hypercytokinemia|Lung Fibrosis	Biological: Application of exosomes in a whole blood assay	Ulm University Hospital, Clinic of Anesthesiology and Intensive Care Medicine, Ulm, Germany	https://ClinicalTrials.gov/show/NCT05191381
30	Study of MSC-Exo on the Therapy for Intensively Ill Children	Withdrawn	No Results Available	Sepsis|Critical Illness		Children's Hospital of Fudan University, Shanghai, Shanghai, China	https://ClinicalTrials.gov/show/NCT04850469
31	the Safety and the Efficacy Evaluation of Allogenic Adipose MSC-Exos in Patients With Alzheimer's Disease	Unknown status	No Results Available	Alzheimer Disease	Biological: low dosage MSCs-Exos administrated for nasal drip|Biological: mild dosage MSCs-Exos administrated for nasal drip|Biological: high dosage MSCs-Exos administrated for nasal drip	Ruijin Hospital Affiliated to Shanghai Jiaotong University School of Medicine, Shanghai, Shanghai, China	https://ClinicalTrials.gov/show/NCT04388982
32	Effect of Microvesicles and Exosomes Therapy on 尾-cell Mass in Type I Diabetes Mellitus (T1DM)	Unknown status	No Results Available	Diabetes Mellitus Type 1	Biological: MSC exosomes.	Sahel Teaching Hospital, Sahel, Cairo, Egypt|Sahel Teaching Hospital - General Committee of Teaching Hospitals and Institutes, Shubra, Cairo, Egypt|Sahel Teaching Hospital, General Commettee of Teaching Hospitals and Institutes., Shubra, Cairo, Egypt	https://ClinicalTrials.gov/show/NCT02138331
33	MSC EVs in Dystrophic Epidermolysis Bullosa	Not yet recruiting	No Results Available	Dystrophic Epidermolysis Bullosa	Drug: AGLE 102		https://ClinicalTrials.gov/show/NCT04173650
34	Stem Cell Derived Exosomes in the Treatment of Melasma and Its Percutaneous Penetration	Recruiting	No Results Available	Melasma	Procedure: 1565 nm non-ablative fractional laser combined with normal saline|Procedure: microneedles combined with hUCMSC-Exos|Procedure: 1565 nm non-ablative fractional laser combined with hUCMSC-Exos|Procedure: PBASM combined with hUCMSC-Exos	Affiliated Union Hospital of Fujian Medical University, Fuzhou, Fujian, China	https://ClinicalTrials.gov/show/NCT06221787
35	Autogenous Mesenchymal Stem Cell Culture-Derived Signalling Molecules as Enhancers of Bone Formation in Bone Grafting	Not yet recruiting	No Results Available	Bone Loss, Osteoclastic|Bone Loss, Alveolar|Alveolar Bone Loss|Alveolar Bone Atrophy|Grafting Bone	Procedure: Maxillary sinus floor elevation grafting with synthetic bone substitute.	Pontificia Universidade Cat贸lica do Rio Grande do Sul, Porto Alegre, RS, Brazil	https://ClinicalTrials.gov/show/NCT04998058
36	Evaluation of Personalized Nutritional Intervention on Wound Healing of Cutaneous Ulcers in Diabetics	Recruiting	No Results Available	Foot, Diabetic	Dietary Supplement: Personalized Nutritional Intervention	Hospital Universitario Reina Sof铆a de C贸rdoba, C贸rdoba, Andaluc铆a, Spain	https://ClinicalTrials.gov/show/NCT05243368
37	Extracellular Vesicle Treatment for Acute Respiratory Distress Syndrome (ARDS) (EXTINGUISH ARDS)	Recruiting	No Results Available	Acute Respiratory Distress Syndrome|ARDS	Biological: ExoFlo|Other: Intravenous normal saline	Direct Biologics Investigational Site, Chandler, Arizona, United States|Direct Biologics Investigational Site, Little Rock, Arkansas, United States|Direct Biologics Investigational Site, Fullerton, California, United States|Direct Biologics Investigational Site, Orange, California, United States|Direct Biologics Investigational Site, Sacramento, California, United States|Direct Biologics Investig…	https://ClinicalTrials.gov/show/NCT05354141
38	Extracellular Vesicle Infusion Treatment for COVID-19 Associated ARDS	Completed	Has Results	COVID-19|ARDS	Biological: ExoFlo|Other: Intravenous normal saline	Direct Biologics Investigational Site, Sheffield, Alabama, United States|Direct Biologics Investigational Site, Anaheim, California, United States|Direct Biologics Investigational Site, Sayre, Pennsylvania, United States|Direct Biologics Investigational Site, Houston, Texas, United States|Direct Biologics Investigational Site, Lubbock, Texas, United States|Direct Biologics Investigational Site, M…	https://ClinicalTrials.gov/show/NCT04493242
39	Therapeutic Potential of Stem Cell Conditioned Medium on Chronic Ulcer Wounds	Completed	No Results Available	Chronic Ulcer	Drug: Conditioned Media	Mayapada Hospital, Tangerang, Banten, Indonesia|Indra Clinic, Tangerang, Banten, Indonesia|Sukma Cliniq, Tangerang, Banten, Indonesia	https://ClinicalTrials.gov/show/NCT04134676
40	Safety and Tolerability Study of MSC Exosome Ointment	Completed	No Results Available	Psoriasis	Drug: Exosome ointment	National University Hospital, Singapore, Singapore	https://ClinicalTrials.gov/show/NCT05523011
